# Supplementary material for: Synthesis and 2nd order nonlinear optical properties of soluble polyimides bearing nitroazobenzene type chromophore pendants attached in side-on modeElectronic supplementary information (ESI) available: experimental details. See http://www.rsc.org/suppdata/jm/b1/b107553e/
Source: Royal Society of Chemistry journal article supplement (doi:10.1039/b107553e), 2002-01-31
Supplement: b107553e.doc [file b107553e.doc]

# Supplementary data

**Synthesis and 2nd Order Nonlinear Optical Properties of Soluble Polyimides Bearing Nitro-azobenzene Type Chromophore Pendants Attached in Side-on Mode**

Bong-Jin Jeon1, Soon Wook Cha1, Mi-Yun Jeong1, Tong Kun Lim2, and Jung-Il Jin1*

1 : Division of Chemistry and Molecular Engineering, and Center for Electro- and Photo-Responsive Molecules, Korea University, Seoul 136-701, South Korea.

2 : Department of Physics, Korea University, Seoul 136-701, South Korea.

Poly (3,3’-dihydroxy-1.1’-biphenylene-4,4’-hexafluoroisopropylidenediphthaldiamide), **PI**. 3,3’-Dihydroxybenzidine (**1**, 3.8 g; 0.017 mol) and 4,4’-(hexafluoroisopropylidene) diphthalic dianhydride (**2**, 7.8 g; 0.017 mol) were dissolved in 80 mL of N,N-dimethylacetamide at 0 oC. The mixture was stirred at 0 oC for 1h under a nitrogen atmosphere. And then the temperature of the reaction mixture was raised to room temperature. *p*-Xylene (80 mL) was mixed with the reaction solution. Imidization was performed by removing water over a period of 3 hours through azeotropic distillation of the *p*-xylene / water mixture. The reaction mixture was added dropwise with vigorous stirring to 50 mL of methanol containing 10 mL of concentrated hydrochloric acid. The product formed was dissolved in tetrahydrofuran and reprecipitated into methanol containing hydrochloric acid. Polyimide formed was purified by Soxhlet extraction with methanol for 2 days. The product yield was 9.5 g (90 %).

1H NMR spectrum (CDCl3, δ ppm): 7.7-8.2 (m, 12H*, Ar-H*), 10.1 (s, 2H, -O*H*). FT-IR spectrum (KBr, cm-1): 3407 (O-H stretching), 1786, 1723 (stretching of amide). Anal. Calcd. for C31H14N2O6F6: C 59.63, H 2.26, N 4.49 %. Found: C 59.69, H 2.27, N 4.63 %.

5-(N,N-Diphenylamino)-1-(2-hydroxyethoxy)-2-(4-nitrophenylazo)benzene, **3(2)**. 5-(N,N-Diphenylamino)-2-(4-nitrophenylazo)phenol(4.0 g; 0.01mol), potassium carbonate (2.8 g; 0.02 mol), tetrabutylammonium bromide (0.32 g; 1.0 mmol) were refluxed for 1h in 100 mL of acetone. 2-Bromoethanol (1.9 g; 0.015mol) was added to the solution. And then the whole mixture was refluxed for 12 h. Insoluble precipitate in the reaction mixture was removed by filtration. The title compound was separated from the crude product by column chromatography on a silica gel using a mixture of ethyl acetate and n-hexane (1: 2 by volume). Finally, it was purified further by recrystallization from a mixture methylene chloride and n-hexane(1 : 5 by volume). The yield was 5.2 g (70 %), mp 135 oC.

1H NMR spectrum (CDCl3, δ ppm): 3.6 (s, 1H, -O*H*), 3.9 (t, 2H, -CH2C*H2*OH), 4.0 (t, 2H, -C*H2*CH2OH), 6.6 (s, 1H, ortho to -OCH2-), 6.7 (d, 1H, para to -OCH2-), 7.2-7.5 (m, 10H, unsubstituted aromatic H), 7.7 (d, 1H, ortho to -N=N-), 7.9 (d, 2H, meta to -NO2), 8.3 (d, 2H, ortho to -NO2). FT-IR spectrum (KBr, cm-1): 3387 (O-H stretching), 1505, 1336 (N-O stretching), 1257, 1102 (C-O stretching). Anal. Calcd. for C26H22N4O4: C 68.71, H 4.88, N 2.33 %. Found: C 68.84, H 4.58, N 12.57 %.

5-(N,N-Diphenylamino)-1-(6-hydroxyhexyloxy)-2-(4-nitrophenylazo)benzene, **3(6)**. This compound was prepared in the same manner as described above for the preparation of **3(2)**. 6-Bromohexanol was employed instead of 2-bromoethanol. The yield was 75 %, oil. The structure of the product was confirmed again spectroscopically and by elemental analysis.

4-(2-Hydroxyethoxy)iodobenzene, **5(2)**. 4-Iodophenol (10.0 g; 0.045 mol), potassium carbonate (25 g; 0.18mol), and tetrabutylammonium bromide (1.5 g; 4.5 mmol) were mixed with in 200 mL of acetone. While the mixture was refluxed, 2-bromoethanol (11 g; 0.091 mol) was added dropwise. The whole mixture was kept being refluxed until the presence of 4-iodophenol could not be detected by TLC. The insoluble were removed by filteration. After the solvent was removed by distillation, the residue was purified by recrystallization from a mixture of acetone and distilled water (4: 1 by volume). The product yield was 10 g (87 %), mp 80 oC.

1H NMR spectrum (CDCl3, δ ppm): 2.6 (s, 1H, -O*H*), 3.9 (t, 2H, -C*H2*OH), 4.0 (t, 2H, -C*H2*-O-Ar), 6.6 (d, 2H, meta to I), 7.5 (d, 2H, ortho to I). FT-IR spectrum (KBr, cm-1): 3475 (O-H stretching), 1258, 1017 (C-O stretching). Anal. Calcd. for C8H9O2I: C 36.39, H 3.44 %. Found: C 36.32, H 3.47 %.

4-(6-Hydroxyhexyloxy)iodobenzene, **5(6)**. This compound was prepared in the same manner as described above for the synthesis of **5(2)**. The crude product was recrystallized for n-hexane. The yield was 87 %, mp 51 oC. Its structure was confirmed spectroscopically and by elemental analysis.

4-(2-(t-Butyldiphenylsiloxy)ethoxy)iodobenzene, **6(2)**. 4-(2-Hydroxyethoxy)iodobenzene, **(5(2),** 5 g; 0.019 mol), t-butylchlorodiphenylsilane (5.7 g; 0.021 mol), triethylamine (2.3 g; 0.023 mol) and 2-dimethylaminopyridine (DMAP, 0.093 g; 0.76 mmol) were dissolved in 50 mL of dry methylene chloride. The mixture was stirred at room temperature for 12 h and then solvent was removed by distillation. The product formed was extracted from the residue using diethyl ether. The oily crude product obtained by distilling out diethyl ether of the extract, was purified by chromotography through a silica gel column using a mixture of methylene chloride and n-hexane (1: 6 by volume) as an eluent. The recovered yield was 8.9 g (94 %), oil.

1H NMR spectrum (CDCl3, δ ppm): 1.1 (m, 9H, *t-butyl*), 3.9 (t, 2H, -C*H2*O-Si-), 4.0 (t, 2H, -C*H2*-O-Ar), 6.6 (d, 2H, meta to I), 7.4, 7.7 (m, 10H, *Ar*-Si-*Ar*), 7.5 (d, 2H, ortho to I). FT-IR spectrum (KBr, cm-1): 2940 (C-H stretching), 1244 (C-O stretching). Anal. Calcd. for C24H27O2ISi: C 57.37, H 5.42 %. Found: C 57.33, H 5.42 %.

4-(6-(t-Butyldiphenylsiloxy)hexyloxy)iodobenzene, **6(6)**. This compound was prepared from 4-(6-hydroxyhexyloxy)iodobenzene, **5(6),** and t-buthyldiphenylsilyl chloride in the same manner as described above for the synthesis of **6(2)**. The yield was 90 %, mp 51 oC. Its structure was confirmed spectroscopically and by elemental analysis.

N-[4-(2-(t-Butyldiphenylsiloxy)ethoxy)phenyl]-N-[4-(4-nitrophenyl)diazophenyl]-N-phenylamine, **7(2)**. Compound **6(2)** (7.7 g: 0.015 mol), Disperse Orange 1 (4.5 g: 0.014 mol), Cu powder (1.8 g; 0.028 mol), potassium carbonate (7.7 g: 0.056 mol) and dibenzo-18-crown-6 (0.50 g: 1.4 mmol) were placed in a three-necked, round-bottomed flask containing 70 mL of 1,2-dichlorobenzene. The mixture was refluxed under a nitrogen atmosphere for 48 h. Insoluble precipitates were removed by filtration. Crude product was obtained by distilling out the dichlorobenzene solvent from the filtrate. Purification was conducted by column chromatography on a silica gel column using a mixture of methylene chloride and n-hexane (1: 2 by volume) as an eluent. The recovered yield was 7.8 g (80 %), oil.

1H NMR spectrum (CDCl3, δ ppm): 1.1 (m, 9H, *t-butyl*), 4.0 (t, 2H, -C*H2*O-Si-), 4.1 (t, 2H, -C*H2*-O-Ar), 6.9 (d, 2H, ortho to -OCH2-), 7.0 (d, 2H, meta to -OCH2-), 7.1-7.8 (m, 19H, *Ar-H*), 7.9 (d, 2H, meta to -NO2), 8.3 (d, 2H, ortho to -NO2). FT-IR spectrum (KBr, cm-1): 3070 (aromatic C-H stretching), 1509, 1345 (N-O stretching), 1244, 1190 (C-O stretching). Anal. Calcd. for C42H40N4O4Si: C 72.81, H 5.82, N 8.09 %. Found: C 72.59, H 5.76, N 8.17 %.

N-(4-(6-(t-Butyldiphenylsiloxy)hexyloxy)phenyl)-N-4-((4-nitrophenyl)diazophenyl)-N-phenylamine, **7(6)**. This compound was prepared from **6(6)** and Disperse Orange 1 in the same manner as described above for the preparation of **7(2)**. The yield was 81 %, oil. Its structure was confirmed spectroscopically and by elemental analysis.

N-[4-(2-Hydroxyethyloxy)phenyl]-N-[4-(4-nitrophenyl)diazophenyl]-N-phenylamine, **4(2)**. Compound **7(2)** (5.0 g; 7.2 mmol) and 15 mL of 1.0 M tetrabutylammonium fluoride (15 mmol) in THF were dissolved in 50 mL of dry THF. The mixture was stirred at room temperature for 12 h. Removal of solvent by distillation left crude product, which was subjected to column chromotography (silica gel) using a mixture of ethyl acetate and n-hexane (1: 2 by volume) as an eluent. The obtained product was again recrystallized from a mixture of methylene chloride and n-hexane (1: 4 by volume). The recovered yield was 2.5 g (75 %), mp 121 oC.

1H NMR spectrum (CDCl3, δ ppm): 3.9 (t, 2H, -C*H2*OH), 4.0 (s, 1H, -O*H*), 4.1 (t, 2H, -C*H2*-O-Ar), 6.9 (d, 2H, ortho to -OCH2-), 7.0 (d, 2H, meta to -OCH2-), 7.1-7.4 (m, 7H, meta to -N=N- and unsubstituted aromatic H), 7.8 (d, 2H, ortho to -N=N-), 8.0 (d, 2H, meta to -NO2), 8.1 (d, 2H, ortho to -NO2). FT-IR spectrum (KBr, cm-1): 3475 (O-H stretching), 1509, 1342 (N-O stretching), 1235, 1133 (C-O stretching). Anal. Calcd. for C26H22 N4O4: C 68.71, H 4.88, N 12.33 %. Found: C 68.78, H 4.77, N 12.39 %.

N-[4-(6-Hydroxyethyloxy)phenyl]-N-[4-(4-nitrophenyl)diazophenyl]-N-phenylamine, **4(6)**. The title compound was prepared from **7(6)** in the same manner as described above for the synthesis of **4(2)**. The yield was 72 %, mp 87 oC. Its structure was confirmed spectroscopically and by elemental analysis.
